# Supplementary material for: Adenovirus delivery of encoded monoclonal antibody protects against different types of influenza virus infection
Source: PubMed Central journal article supplement (PMC7347565; doi:10.1038/s41541-020-0206-5), 2020-07-09

**Figure 1A, upper bands (non-reducing)**

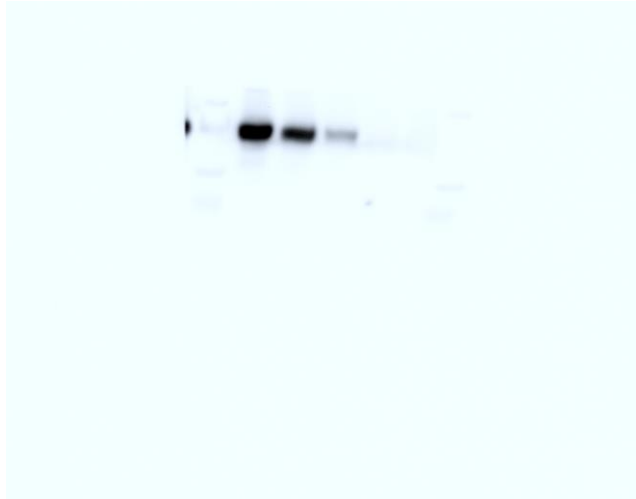

**Figure 1A, lower bands (reducing)**

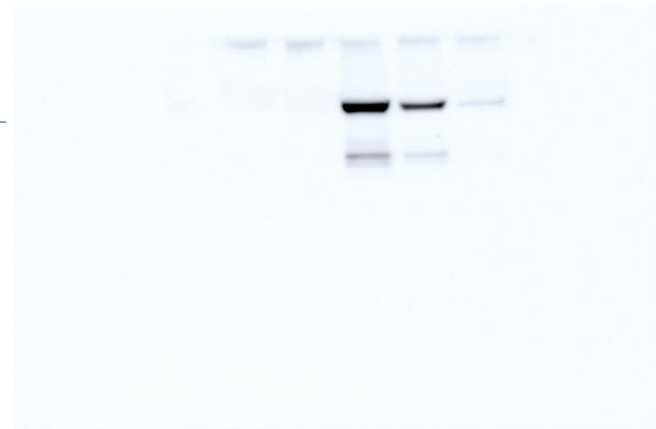

Same gel

**Figure 1A, upper bands (non-reducing)  
Bright field with Marker**

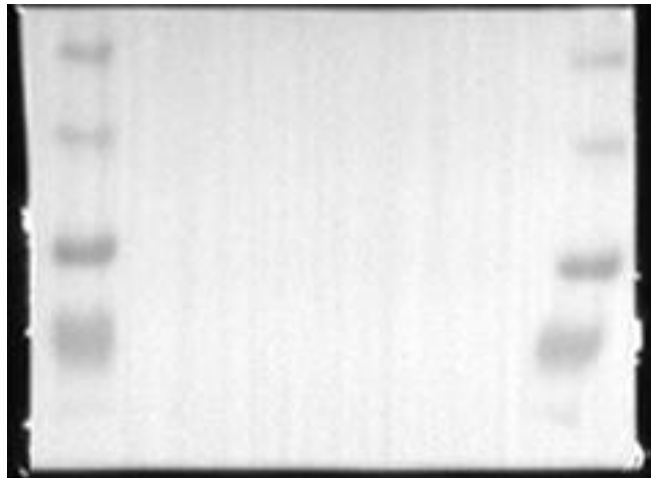

Same gel

**Figure 1A, lower bands (reducing)  
Bright field with Marker**

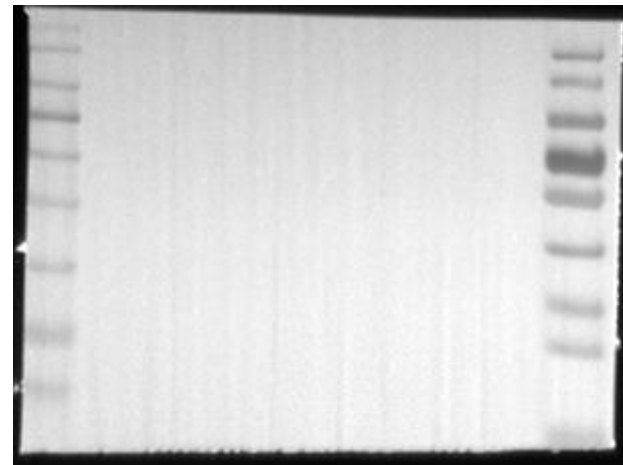

**Figure 1B, Coomassie Blue Staining**

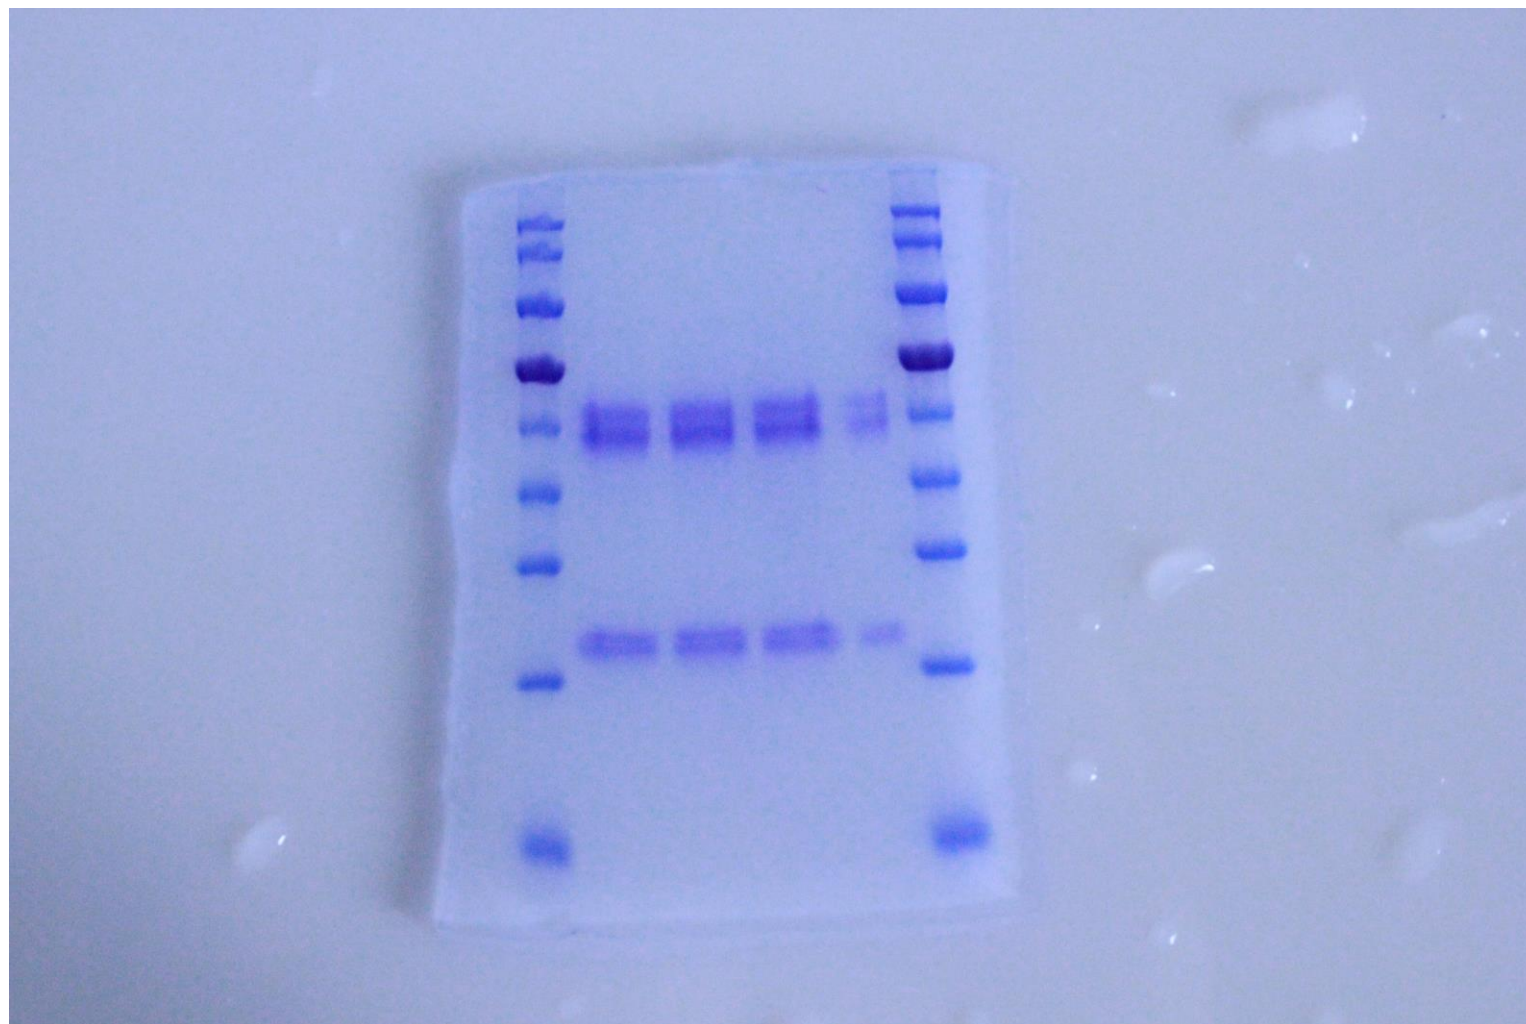

Supplement: 41541_2020_206_MOESM1_ESM.pdf [file 41541_2020_206_MOESM1_ESM.pdf]
